# Supplementary material for: Probing the Phytochemical Composition and Antioxidant Activity of Moringa oleifera under Ideal Germination Conditions
Source: Plants (Basel). 2023 Aug 21;12(16):3010. doi: 10.3390/plants12163010 (PMC10459117; doi:10.3390/plants12163010)
Supplement: Supplementary file 1 [file plants-12-03010-s001.zip › plants-2445170-supplementary.pdf]

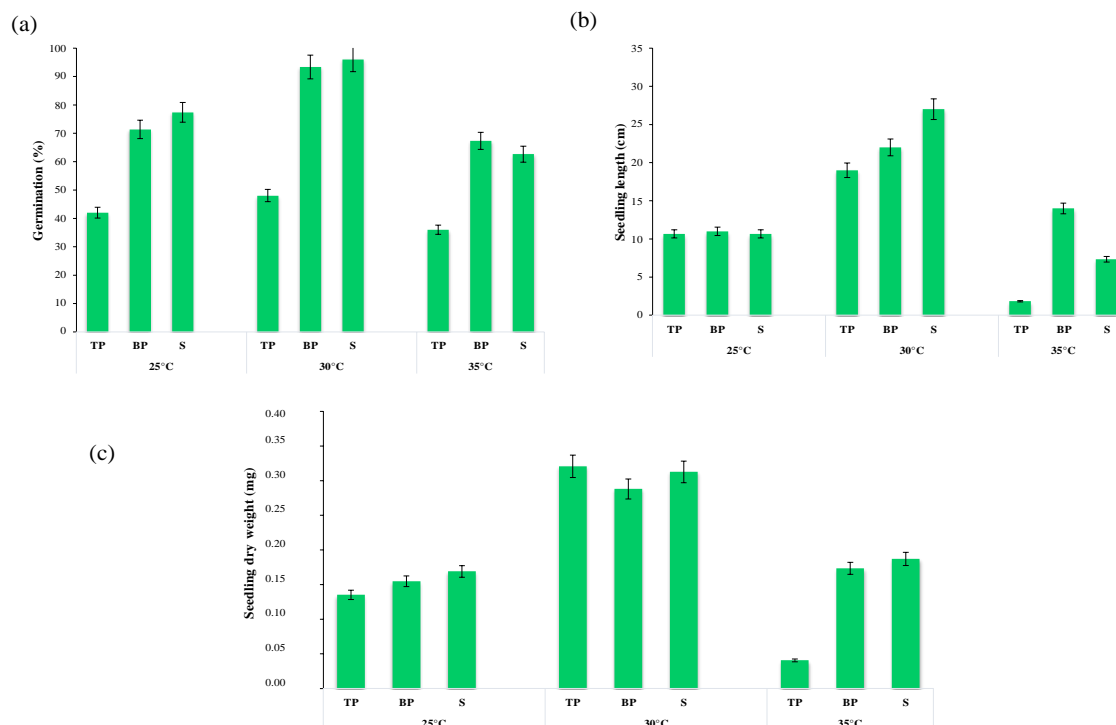

**Supplementary Figure S1.** Effect of temperature on germination studies of Moringa seedlings at the early growth stage. (a) Standard germination (b) seedling length; (c) dry weight; (d) vigour index-I; (e) vigour index-II. Data are expressed as Mean $\pm$ SD. Values are presented on a fresh weight (FW) basis.

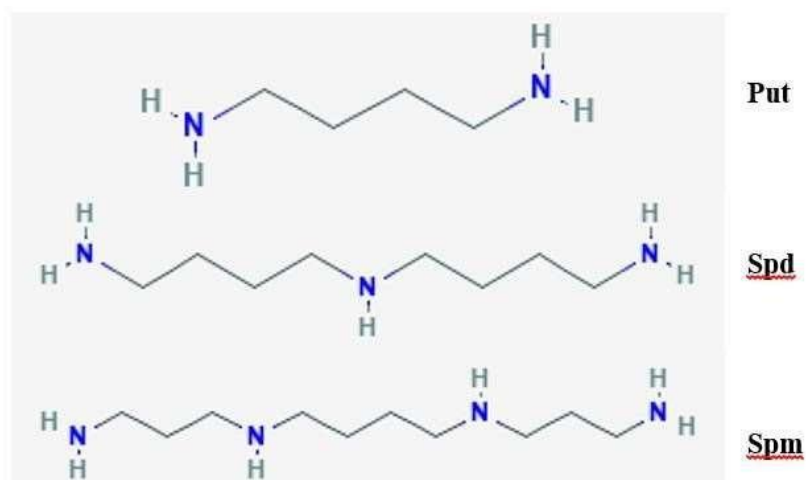

**Supplementary Figure S2.** Chemical structures of the polyamines discussed in this study.

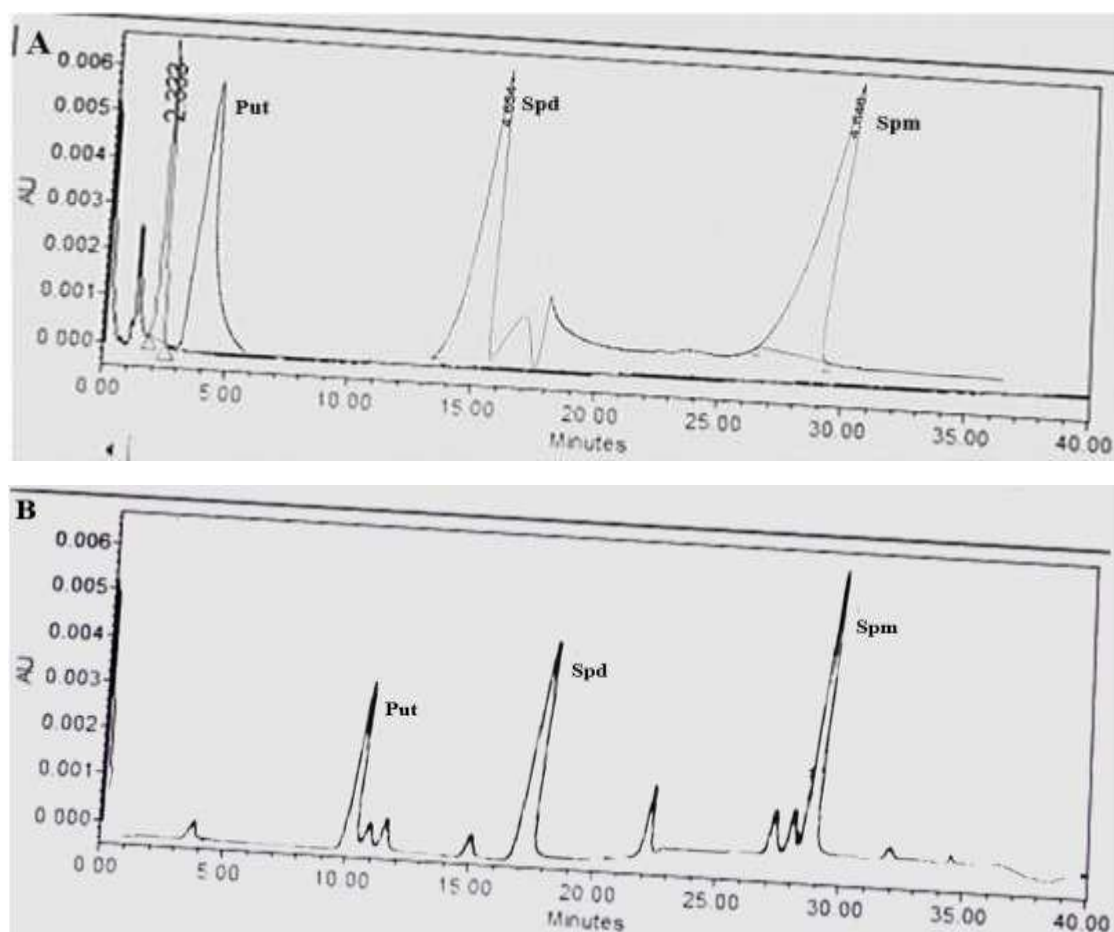

**Supplementary Figure S3.** HPLC chromatogram of benzoylated polyamine (a) HPLC chromatogram of benzoylated polyamine standards; Put, Spd, and Spm at 0.05mM concentration (b) Identification of polyamines in Moringa extracts with each of each Put, Spd, and Spm.
